# Supplementary material for: Makeup cotton pads derived-hierarchically porous carbon fibers for constructing a free-standing carbon/sulfur hybrid cathode
Source: Royal Society of Chemistry journal article supplement (doi:10.1039/d3nj03749e), 2023-01-01
Supplement: d3nj03749e1.pdf [file d3nj03749e1.pdf]

## Supporting Information

### **Makeup cotton derived hierarchically porous carbon fibers for constructing a free-standing carbon/sulfur hybrid cathode**

Shixun Yang<sup>a, b, 1</sup>, Yuyun Li<sup>a, b, 1</sup>, Qian Su<sup>a, b</sup>, Zhe Hu<sup>a, b</sup>, Mingwu Xiang<sup>a, b, \*</sup>,  
Junming Guo<sup>a, b</sup>, Wei Bai<sup>a, b</sup>, Shuping Deng<sup>c</sup>

<sup>a</sup> National and Local Joint Engineering Research Center for Green Preparation Technology of Biobased Materials, Yunnan Minzu University, Kunming, 650500, China.

<sup>b</sup> Key Laboratory of Green-chemistry Materials in University of Yunnan Province, Yunnan Minzu University, Kunming, 650500, China.

<sup>c</sup> School of Physical Science and Technology, Kunming University, Kunming, 650214, China.

<sup>1</sup> Shixun Yang and Yuyun Li are the co-first author in this article.

\*Corresponding author E-mail: xmwbbboy@163.com

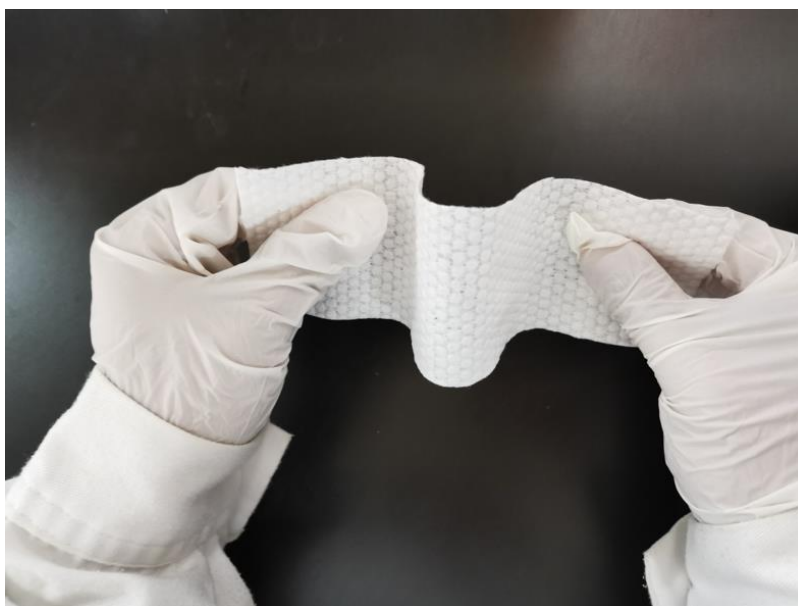

**Fig.S1** Flexibility of the pristine MC sample.

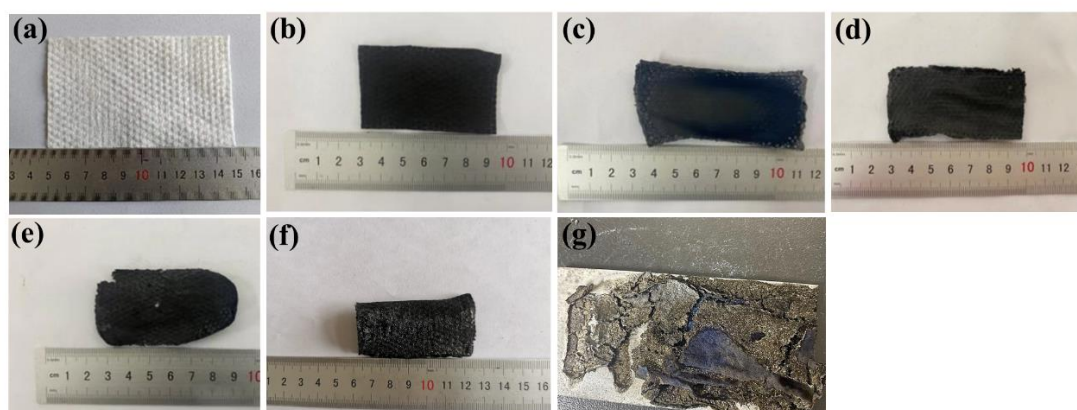

**Fig.S2** Digital pictures of (a) MC, (b) CFC, (c) SPCFC<sub>0.05</sub>, (d) SPCFC<sub>0.10</sub>, (e) SPCFC<sub>0.15</sub>, (f) SPCFC<sub>0.20</sub> and (g) SPCFC<sub>0.30</sub> samples.

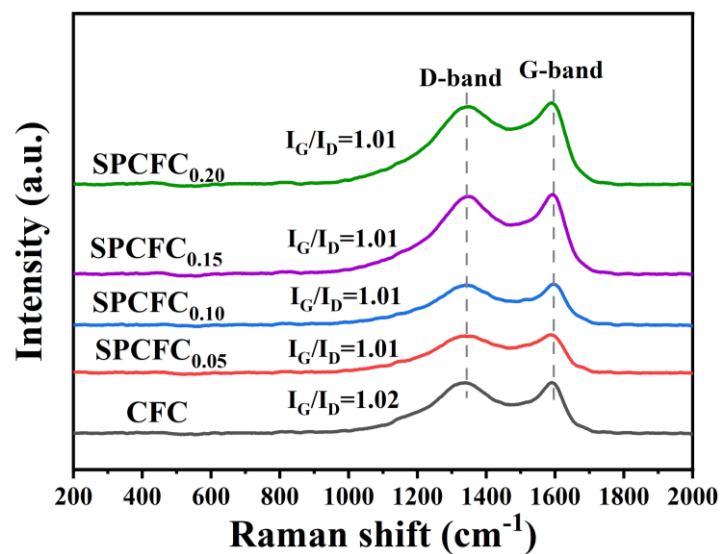

**Fig.S3** Raman spectra of CFC, SPCFC<sub>0.05</sub>, SPCFC<sub>0.10</sub>, SPCFC<sub>0.15</sub> and SPCFC<sub>0.20</sub> samples.

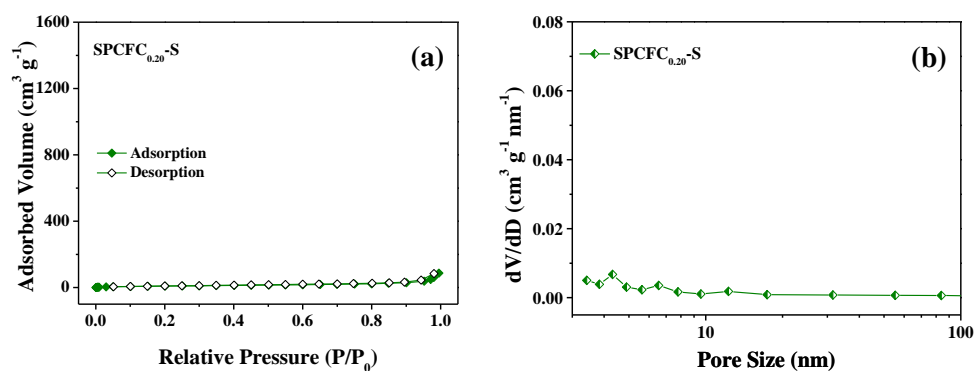

**Fig.S4** (a) N<sub>2</sub> adsorption/desorption isotherms and (b) Pore size distribution of SPCFC<sub>0.20</sub>-S cathode.

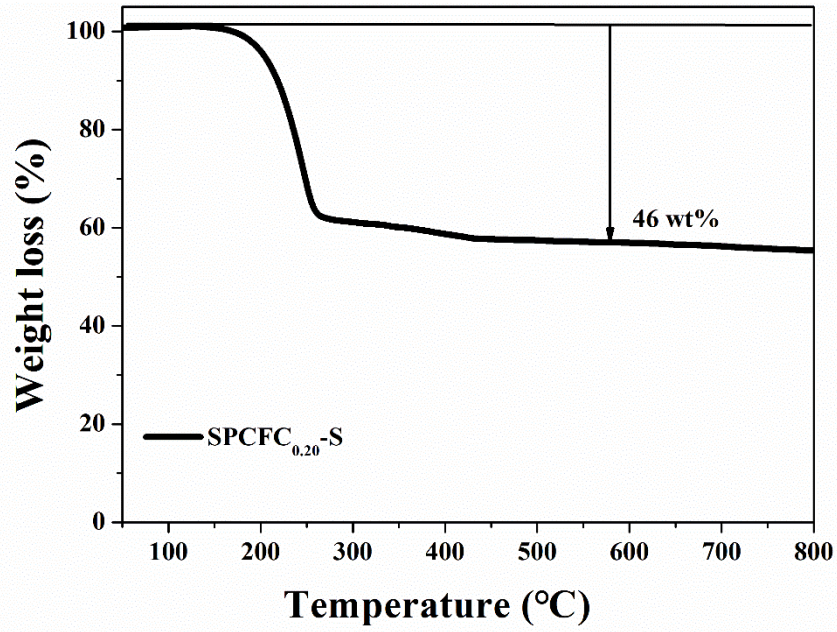

Fig.S5 TGA curve of SPCFC<sub>0.20</sub>-S composite.

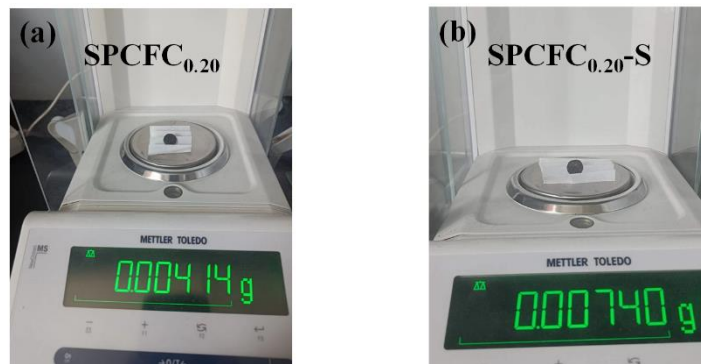

Fig.S6 Weight change of (a) SPCFC<sub>0.20</sub> and (b) SPCFC<sub>0.20</sub>-S samples before and after loading active sulfur.

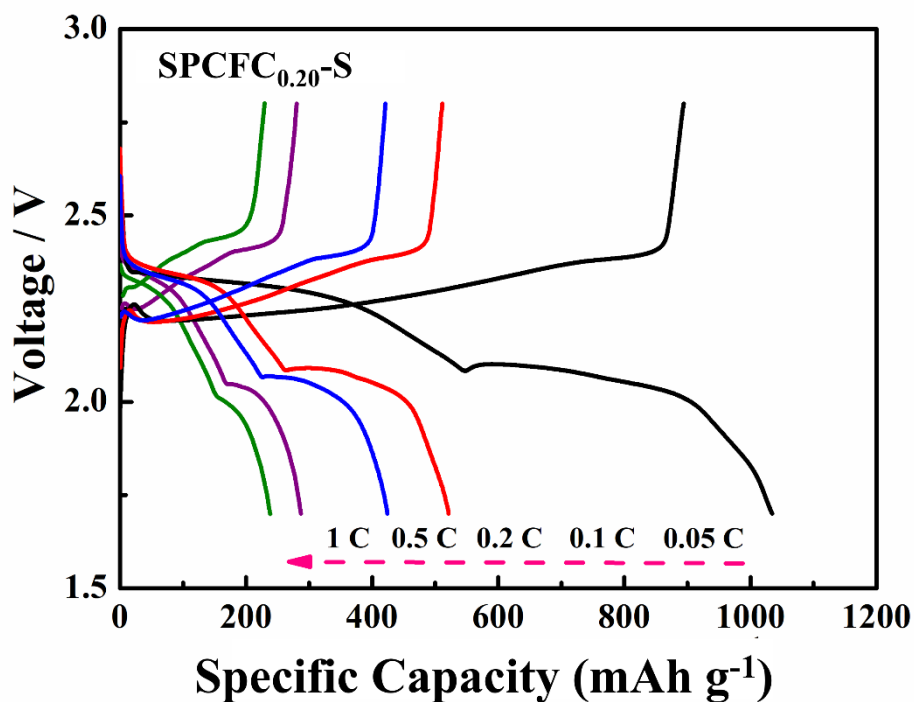

**Fig.S7** The corresponding first charge/discharge curves of the SPCFC<sub>0.20</sub>-S electrode at different current rates from 0.05 C to 1 C.

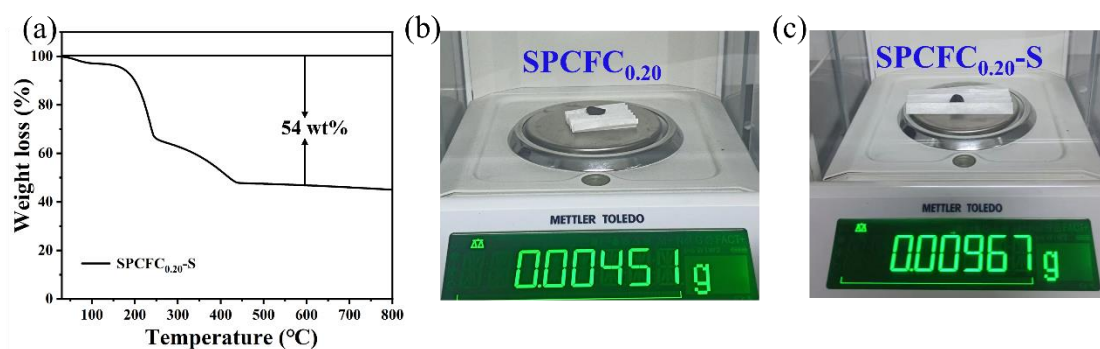

**Fig.S8** (a) TGA curve of SPCFC<sub>0.20</sub>-S composite, the weight change of (b) SPCFC<sub>0.20</sub> and (c) SPCFC<sub>0.20</sub>-S samples before and after loading active sulfur.

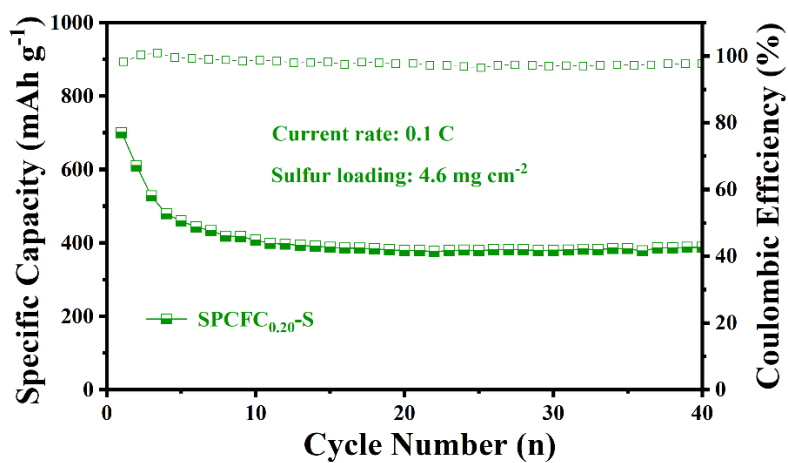

**Fig.S9** Cycle performance of the SPCFC<sub>0.20</sub>-S cathode at 0.1 C after two cycles activation at 0.05 C.

**Table S1** Specific surface area and pore volume of CFC, SPCFC<sub>0.05</sub>, SPCFC<sub>0.10</sub>, SPCFC<sub>0.15</sub> and SPCFC<sub>0.20</sub> samples.

| samples               | $S_{\text{BET}}$ ( $\text{m}^2 \text{g}^{-1}$ ) | $V_{\text{total}}$ ( $\text{cm}^3 \text{g}^{-1}$ ) |
|-----------------------|-------------------------------------------------|----------------------------------------------------|
| CFC                   | 613                                             | 0.25                                               |
| SPCFC <sub>0.05</sub> | 1083                                            | 0.56                                               |
| SPCFC <sub>0.10</sub> | 1463                                            | 0.78                                               |
| SPCFC <sub>0.15</sub> | 1744                                            | 0.88                                               |
| SPCFC <sub>0.20</sub> | 2080                                            | 1.45                                               |

$S_{\text{BET}}$  specific surface area by BET method,  $V_{\text{total}}$  total pore volume by the DFT method.
